# Supplementary material for: The possible involvement of oxidative stress in the oocyte ageing process in goldfish Carassius auratus (Linnaeus, 1758)
Source: PubMed Central journal article supplement (PMC6639355; doi:10.1038/s41598-019-46895-1), 2019-07-18
Supplement: 41598_2019_46895_MOESM1_ESM.pdf [file 41598_2019_46895_MOESM1_ESM.pdf]

## Supporting information

**Manuscript Title:** The possible involvement of oxidative stress in the oocyte ageing process in goldfish *Carassius auratus* (Linnaeus, 1758)

**Author list:** Azadeh Mohagheghi Samarin, Azin Mohagheghi Samarin\*, Tone-Kari Knutsdatter Østbye, Bente Ruyter, Sabine Sampels, Viktoriia Burkina, Miroslav Blecha, Tomas Policar

**S1 Table.** Embryo survival rates during *in vitro* oocyte ageing in goldfish.

**S2 Table.** mRNA abundance of the selected transcripts relative to *b-actin* during *in vitro* oocyte ageing in goldfish.

**S3 Table.** Activities of catalase (CAT) ( $\mu\text{mol}/\text{min}/\text{mg}$ ), superoxide dismutase (SOD) ( $\mu\text{mol}/\text{min}/\text{mg}$ ), glutathione reductase (GR) ( $\mu\text{mol}/\text{min}/\text{mg}$ ) and glutathione peroxidase (GPX) ( $\mu\text{mol}/\text{min}/\text{mg}$ ) during *in vitro* oocyte ageing in goldfish.

**S4 Table.** TBARS values, expressed as malonaldehyde (MDA) ( $\mu\text{g g}^{-1}$ ) during *in vitro* oocyte ageing in goldfish.

**S1**

| <b>Treatment (HPS)</b> | <b>Replicate</b> | <b>Embryo survival%</b> |
|------------------------|------------------|-------------------------|
| 1 (0)                  | 1                | 61.64                   |
| 1 (0)                  | 2                | 60.07                   |
| 1 (0)                  | 3                | 63.04                   |
| 1 (0)                  | 4                | 46.56                   |
| 1 (0)                  | 5                | 72                      |
| 1 (0)                  | 6                | 48.8                    |
| 2 (3)                  | 1                | 75                      |
| 2 (3)                  | 2                | 56.16                   |
| 2 (3)                  | 3                | 68.08                   |
| 2 (3)                  | 4                | 40.76                   |
| 2 (3)                  | 5                | 57.56                   |
| 2 (3)                  | 6                | 52.87                   |
| 3 (6)                  | 1                | 32.97                   |
| 3 (6)                  | 2                | 46.85                   |
| 3 (6)                  | 3                | 41.66                   |
| 3 (6)                  | 4                | 40                      |
| 3 (6)                  | 5                | 39.61                   |
| 3 (6)                  | 6                | 34.16                   |
| 4 (9)                  | 1                | 13.84                   |
| 4 (9)                  | 2                | 12.55                   |
| 4 (9)                  | 3                | 26.6                    |
| 4 (9)                  | 4                | 37.32                   |
| 4 (9)                  | 5                | 21.53                   |
| 4 (9)                  | 6                | 14.28                   |
| 5 (12)                 | 1                | 5.05                    |
| 5 (12)                 | 2                | 6.5                     |
| 5 (12)                 | 3                | 15.32                   |
| 5 (12)                 | 4                | 12.8                    |
| 5 (12)                 | 5                | 0.99                    |
| 5 (12)                 | 6                | 4.46                    |
| 6 (18)                 | 1                | 0                       |
| 6 (18)                 | 2                | 0                       |
| 6 (18)                 | 3                | 0                       |
| 6 (18)                 | 4                | 0                       |
| 6 (18)                 | 5                | 0                       |
| 6 (18)                 | 6                | 0                       |

## S2

| Treatment (HPS) | Replicate | hsp70    | cox1     | sod      | sod Mn   | sod Cu/Zn | calmodulin |
|-----------------|-----------|----------|----------|----------|----------|-----------|------------|
| 1 (0)           | 1         | 0.050267 | 0.869758 | -1.51327 | 0.860359 | -1.015541 | -0.476953  |
| 1 (0)           | 2         | 0.139496 | 0.433053 | -1.02417 | 1.102295 | -0.868605 | 0.06721303 |
| 1 (0)           | 3         | 0.190916 | -0.26323 | -1.31739 | 0.641912 | -1.418988 | -0.2959259 |
| 1 (0)           | 4         | 0.195873 | 0.754747 | -0.9642  | 0.665338 | -1.430562 | -0.1568284 |
| 1 (0)           | 5         | 0.234278 | -0.77353 | 2.106889 | -0.38766 | 1.9664395 | 1.21774093 |
| 1 (0)           | 6         | -0.80083 | -0.99765 | 2.702657 | -2.84068 | 2.8084186 | -0.362354  |
| 2 (3)           | 1         | 0.70235  | 1.002    | -0.81426 | 0.896061 | -0.964839 | -0.0941183 |
| 2 (3)           | 2         | 0.231969 | 0.56452  | -0.69561 | 0.992954 | -0.912946 | 0.20644253 |
| 2 (3)           | 3         | -0.0817  | -0.33128 | -1.20199 | 0.464486 | -1.886414 | -0.1229443 |
| 2 (3)           | 4         | -0.03885 | 0.355608 | -1.10909 | 0.881358 | -1.454542 | -0.0702056 |
| 2 (3)           | 5         | -0.97593 | -1.43727 | 1.924179 | -2.19951 | 2.0995882 | -1.243279  |
| 2 (3)           | 6         | -1.23816 | -1.15931 | 2.502455 | -1.71751 | 3.1415889 | 0.55953598 |
| 3 (6)           | 1         | -0.21188 | 0.737804 | -1.47521 | 0.37187  | -1.92403  | -0.5589187 |
| 3 (6)           | 2         | 0.235596 | 1.268157 | -0.62718 | 0.968934 | -1.741966 | 0.40156594 |
| 3 (6)           | 3         | -0.138   | -0.47792 | -0.97029 | 0.34838  | -1.01752  | 0.37696535 |
| 3 (6)           | 4         | -0.14287 | 0.726087 | -0.72935 | 0.696933 | -1.213967 | -0.189523  |
| 3 (6)           | 5         | -1.14136 | -1.01295 | 2.172121 | -1.59492 | 1.9041845 | 1.2420725  |
| 3 (6)           | 6         | -0.80096 | -0.47111 | 1.552746 | -1.92951 | 1.4595887 | 1.70762643 |
| 4 (9)           | 1         | -0.0089  | 0.549967 | -1.35431 | 0.817784 | -1.283116 | -0.2855578 |
| 4 (9)           | 2         | 0.18107  | 0.240621 | -0.6675  | 1.348614 | -0.712286 | 0.549242   |
| 4 (9)           | 3         | -0.365   | -0.53657 | -0.74413 | 0.668124 | -1.027776 | -0.1546122 |
| 4 (9)           | 4         | -1.75425 | -1.5545  | 2.010123 | -2.82315 | 2.2659505 | -0.9265028 |
| 4 (9)           | 5         | -0.02313 | -0.88251 | 2.398496 | -2.15687 | 2.3572274 | 1.91955522 |
| 4 (9)           | 6         | -0.2598  | -0.55144 | 1.511848 | -1.94894 | 1.0301635 | 1.02606814 |
| 5 (12)          | 1         | 0.068114 | 0.526222 | -1.36582 | 0.778423 | -0.952477 | -0.6413425 |
| 5 (12)          | 2         | 0.092824 | 0.399561 | -0.45111 | 0.580338 | -0.785562 | 0.44418771 |
| 5 (12)          | 3         | 0.061447 | -0.38601 | -0.80903 | 0.415295 | -1.330605 | -0.0545853 |
| 5 (12)          | 4         | -0.90351 | -1.28276 | 1.388776 | -2.20766 | 1.94144   | 0.66918175 |
| 5 (12)          | 5         | -0.74648 | -1.58101 | 1.599358 | -2.53851 | 1.5655883 | -1.0757479 |
| 5 (12)          | 6         | -1.85659 | -0.77848 | 2.304757 | -1.66134 | 2.1277591 | -0.1283719 |
| 6 (18)          | 1         | -0.32718 | 0.554807 | -1.02918 | 0.881295 | -0.504605 | -0.4889294 |
| 6 (18)          | 2         | -0.19327 | 0.866257 | -0.64955 | 0.870253 | -0.810647 | 0.19533457 |
| 6 (18)          | 3         | -0.23186 | -0.50516 | -1.03043 | 0.372571 | -1.263329 | 0.59457371 |
| 6 (18)          | 4         | -0.64643 | -0.53172 | 1.997985 | -1.14715 | 2.0269511 | 1.49397953 |
| 6 (18)          | 5         | -0.614   | -1.30907 | 1.882733 | -3.13236 | 2.0917379 | 0.90065227 |
| 6 (18)          | 6         | -0.10279 | 0.000907 | 2.091674 | -0.81821 | 2.2358868 | 2.07754658 |

| <b>vasa</b> | <b>igf2</b> | <b>cathepsin B</b> | <b>cyclin A</b> | <b>cyclin A2</b> | <b>cyclin B</b> | <b>jnk 1</b> |
|-------------|-------------|--------------------|-----------------|------------------|-----------------|--------------|
| 0.112338    | 0.304728    | -1.52474066        | -0.34554        | 0.757859         | 1.346159        | 0.871959     |
| 0.849542    | -1.056      | 0.08219484         | -0.12861        | -0.08521         | 0.253095        | 0.863895     |
| 0.848184    | 0.149996    | -0.80318834        | -0.54399        | -0.01559         | -0.01229        | 0.293512     |
| 0.275606    | -1.76842    | -0.29976222        | -0.44556        | 0.297838         | -0.63386        | 0.281938     |
| -0.57258    |             | 1.97723948         | 1.406439        | 0.594839         | 0.458139        | -1.30106     |
| -1.51663    | -0.13958    | 0.60921862         | 0.098419        | -1.50818         | -1.36988        | -0.96908     |
| 1.328286    | -0.64051    | -1.45403898        | -0.14484        | 0.473561         | 0.476861        | 0.027661     |
| 0.73531     | -0.67961    | 0.03785439         | -0.00795        | 0.405454         | 0.238754        | 0.944554     |
| 0.68617     | -0.54891    | -1.33061386        | -0.82141        | -0.26301         | -0.63971        | -0.37891     |
| 0.548172    | -1.63443    | -0.40374156        | -0.32954        | 0.463858         | -0.73284        | 0.077958     |
| -1.42839    |             | 0.15038824         | -0.02541        | -2.49201         | -1.66371        | -1.11291     |
| -0.31553    | 0.224825    | 1.20238895         | 0.621589        | -0.71501         | -0.85171        | -0.92091     |
| -0.06291    | -0.07336    | -2.35323047        | -1.00903        | 0.36937          | -0.06733        | -0.15653     |
| 0.85483     | -1.22916    | -0.22616607        | -0.38197        | 0.371434         | -0.19527        | 0.325534     |
| 0.819555    | -0.35943    | -0.78672029        | -0.66752        | -0.22412         | -0.05082        | 0.41998      |
| 0.580144    | -2.05827    | -0.36316678        | -0.63397        | 0.399433         | -0.84727        | 0.238533     |
| -2.02016    |             | 2.17998449         | 1.714184        | 0.597584         | 0.915884        | -1.75332     |
| -0.52301    | 0.243244    | 2.11538875         | 1.744589        | 0.657989         | 0.556289        | -0.53291     |
| 0.431666    | -0.25072    | -1.65231564        | -0.47312        | 0.370284         | 0.473584        | 0.484384     |
| 1.234746    | -1.08782    | 0.09851393         | 0.102714        | 0.301114         | 0.089414        | 0.845214     |
| 0.51509     | -0.09142    | -0.76697558        | -0.38778        | -0.05938         | 0.028924        | 0.189724     |
| -1.24998    |             | -0.21824953        | -0.13405        | -2.58565         | -1.77735        | -0.19655     |
| -1.46155    |             | 2.61802743         | 1.897227        | 1.800627         | 2.078927        | -1.43027     |
| -1.51382    | 1.504848    | 1.43096353         | 0.945164        | -0.07644         | -0.27314        | -0.98734     |
| 0.063951    | -0.38799    | -1.57667716        | -0.51248        | 0.450923         | 0.674223        | 0.885023     |
| 1.068884    | -1.8895     | -0.12976222        | -0.12056        | -0.10216         | -0.09386        | 0.306938     |
| 0.741838    | -0.26751    | -0.86480536        | -0.54561        | -0.13221         | -0.18391        | -0.05311     |
| -2.05702    |             | 1.09223998         | 1.02644         | -0.68516         | -0.37686        | -0.53106     |
| -2.5894     |             | 0.41638834         | 0.520588        | -2.42101         | -1.31271        | -0.36191     |
| -2.03602    | 1.019325    | 0.83355907         | 0.477759        | -1.16384         | -1.30554        | -0.47974     |
| 0.136964    | 0.616816    | -1.09380476        | -0.0096         | 0.808795         | 0.937095        | 0.992895     |
| 0.30207     | -1.39174    | -0.26484699        | -0.28565        | 0.207753         | -0.08395        | 0.566853     |
| 0.549353    | -0.64567    | -1.0575288         | -0.73333        | -0.18493         | -0.35663        | 0.139171     |
| -0.81212    |             | 1.92275107         | 1.366951        | 0.335351         | 0.048651        | -1.38555     |
| -1.4927     |             | 1.95753791         | 1.166738        | 0.800138         | 0.948438        | -1.36576     |
| -0.28652    | 1.000588    | 2.57168677         | 2.020887        | 0.754287         | 0.762587        | 0.008387     |

**S3**

| <b>Treatment (HPS)</b> | <b>Replicate</b> | <b>CAT</b><br><b>μmol/min/mg</b> | <b>SOD</b><br><b>μmol NBT/min/mg protein</b> |
|------------------------|------------------|----------------------------------|----------------------------------------------|
| 1 (0)                  | 1                | 0.411466133                      | 1.096355814                                  |
| 1 (0)                  | 2                | 1.695267195                      | 1.826670304                                  |
| 1 (0)                  | 3                | 1.694066673                      | 2.526039898                                  |
| 1 (0)                  | 4                | 1.942217083                      | 1.29150446                                   |
| 1 (0)                  | 5                | 1.375894916                      | 2.613261046                                  |
| 1 (0)                  | 6                | 1.206655513                      | 3.508959845                                  |
| 2 (3)                  | 1                | 0.529470142                      | 1.29618911                                   |
| 2 (3)                  | 2                | 0.479338726                      | 2.307315032                                  |
| 2 (3)                  | 3                | 0.654184177                      | 3.067576468                                  |
| 2 (3)                  | 4                | 0.89617                          | 1.647713044                                  |
| 2 (3)                  | 5                | 0.271660732                      | 3.258612837                                  |
| 2 (3)                  | 6                | 0.615772067                      | 4.013679637                                  |
| 3 (6)                  | 1                | 1.24945689                       | 1.27425438                                   |
| 3 (6)                  | 2                | 0.700802439                      | 2.093289372                                  |
| 3 (6)                  | 3                | 0.326510827                      | 1.295533987                                  |
| 3 (6)                  | 4                | 0.113175645                      | 1.346783271                                  |
| 3 (6)                  | 5                | 1.400402078                      | 2.123965152                                  |
| 3 (6)                  | 6                | 2.798732433                      | 3.613390895                                  |
| 4 (9)                  | 1                | 0.495658509                      | 1.550694226                                  |
| 4 (9)                  | 2                | 1.027382818                      | 2.296127607                                  |
| 4 (9)                  | 3                | 1.655426119                      | 1.787359376                                  |
| 4 (9)                  | 4                | 2.117647059                      | 2.059464479                                  |
| 4 (9)                  | 5                | 1.837105536                      | 2.794596296                                  |
| 4 (9)                  | 6                | 1.901310502                      | 3.331823205                                  |
| 5 (12)                 | 1                | 0.48125068                       | 1.90532593                                   |
| 5 (12)                 | 2                | 0.744058571                      | 1.753017446                                  |
| 5 (12)                 | 3                | 1.395007599                      | 2.065957443                                  |
| 5 (12)                 | 4                | 1.249658603                      | 2.74775399                                   |
| 5 (12)                 | 5                | 0.657113207                      | 3.97589555                                   |
| 5 (12)                 | 6                | 0.832719808                      | 3.68960531                                   |

| <b>GR</b>          | <b>GPx</b>         |
|--------------------|--------------------|
| <b>μmol/min/mg</b> | <b>nmol/min/mg</b> |
| 0.120935548        | 0.36631535         |
| 0.164344967        | 0.496486902        |
| 0.112627018        | 0.455716517        |
| 0.211403105        | 0.598363714        |
| 0.187954534        | 0.378061391        |
| 0.141075523        | 0.631339857        |
| 0.151205537        | 0.114044434        |
| 0.192949408        | 0.264637986        |
| 0.136151903        | 0.218964906        |
| 0.208635065        | 0.301440866        |
| 0.112669331        | 0.281262726        |
| 0.124402497        | 0.275897554        |
| 0.155922186        | 0.323167463        |
| 0.195752199        | 0.309506641        |
| 0.196224412        | 0.261114603        |
| 0.19902694         | 0.474782421        |
| 0.175977339        | 0.411304763        |
| 0.137185077        | 0.110812182        |
| 0.146462522        | 0.293659251        |
| 0.225812034        | 0.476889771        |
| 0.109835711        | 0.264810332        |
| 0.184846316        | 0.365846966        |
| 0.13783372         | 0.560347699        |
| 0.144328484        | 0.180046798        |
| 0.145359413        | 0.398964751        |
| 0.211768876        | 0.750625594        |
| 0.141073288        | 0.231253932        |
| 0.215604944        | 0.424127136        |
| 0.1344649          | 0.442574972        |
| 0.136933498        | 0.29310405         |

**S4**

| <b>Treatment (HPS)</b> | <b>Replicate</b> | <b>MDA (<math>\mu\text{g g}^{-1}</math>)</b> |
|------------------------|------------------|----------------------------------------------|
| 1 (0)                  | 1                | 4.539081826                                  |
| 1 (0)                  | 2                | 5.007880606                                  |
| 1 (0)                  | 3                | 5.338477171                                  |
| 1 (0)                  | 4                | 2.30006165                                   |
| 2 (3)                  | 1                | 4.04709229                                   |
| 2 (3)                  | 2                | 4.405366081                                  |
| 2 (3)                  | 3                | 4.904474139                                  |
| 2 (3)                  | 4                | 3.453459272                                  |
| 3 (6)                  | 1                | 3.43994357                                   |
| 3 (6)                  | 2                | 5.228767442                                  |
| 3 (6)                  | 3                | 5.375611524                                  |
| 3 (6)                  | 4                | 3.295700625                                  |
| 4 (9)                  | 1                | 2.719702791                                  |
| 4 (9)                  | 2                | 4.502378281                                  |
| 4 (9)                  | 3                | 4.936112242                                  |
| 4 (9)                  | 4                | 5.106876522                                  |
| 5 (12)                 | 1                | 3.345348176                                  |
| 5 (12)                 | 2                | 4.265465419                                  |
| 5 (12)                 | 3                | 4.924423281                                  |
| 6 (18)                 | 1                | 4.240334467                                  |
| 6 (18)                 | 2                | 4.425549754                                  |
| 6 (18)                 | 3                | 4.392858822                                  |
